**Classification:** Biological Sciences / Microbiology, Systems Biology

**Title:** Short-range interactions govern cellular dynamics in microbial multi-genotype systems

**Authors:** A. Dal Co<sup>a\*</sup>, S. van Vliet<sup>a,b</sup>, D. J. Kiviet<sup>a</sup>, S. Schlegel<sup>a</sup>, M. Ackermann<sup>a</sup>

**Affiliations:**

<sup>a</sup>*Department of Environmental Systems Science, ETH Zurich, and Department of Environmental Microbiology Eawag, Ueberlandstrasse 133PO Box 611, 8600 Duebendorf, Switzerland*

<sup>b</sup>*Department of Zoology, University of British Columbia, 4200-6270 University Blvd., V6T 1Z4 Vancouver, Canada*

\*Corresponding author: [alma.dalco@gmail.com](mailto:alma.dalco@gmail.com)

**Keywords:** microbial interactions, synthetic communities, metabolic exchange

## 1 **Abstract**

2 Ecosystem processes result from interaction between organisms. When interactions  
3 are local, the spatial organization of organisms defines their network of interactions,  
4 and thus influences the system's functioning. This can be especially relevant for  
5 microbial systems, which often consist of spatially structured communities of cells  
6 connected by a dense interaction network. Here we measured the spatial interaction  
7 network between cells in microbial systems and identify the factors that determine it.  
8 Combining quantitative single-cell analysis of synthetic bacterial communities with  
9 mathematical modeling, we find that cells only interact with other cells in their  
10 immediate neighbourhood. This short interaction range impacts the functioning of the  
11 whole system by reducing its ability to perform metabolic processes collectively. Our  
12 experiments and models demonstrate that the spatial scale of cell-to-cell interaction  
13 plays a fundamental role in understanding and controlling natural communities, and in  
14 engineering microbial systems for specific purposes.

15

## 16 **Significance Statement**

17 Communities of interacting microbes perform fundamental processes on earth. We do  
18 not understand well how these processes emerge from the interactions between  
19 individual microbial cells. Our work investigates how strongly individual cells  
20 interact and how the strength of the interaction depends on the distance between cells.  
21 The discovery that individual cells 'live in a small world', i.e. they only interact with  
22 a small number of cells around them, changes our understanding of how cells in  
23 natural microbial communities are metabolically coupled and how their spatial  
24 arrangement determines emergent properties at the community level. Our quantitative  
25 single-cell approach allows to address central questions on systems composed of  
26 interacting genotypes and to increase our understanding and ability to control  
27 microbial communities.

## 28 **Text**

29 Microbial systems perform processes that ultimately sustain all of life (1, 2). These  
30 processes are often based on metabolic interactions between different types of  
31 organisms (3–5) and are thus an emergent property of microbial systems. Metabolic  
32 interactions are often essential because many microorganisms are unable to perform  
33 all anabolic functions required for life and thus need to obtain compounds from other

34 species (6–8). These metabolic interactions are expected to decay with the distance  
35 between individual cells (9), which thus determines whether cells can or cannot  
36 interact. Little is known about the spatial scale at which cells interact and the  
37 biological parameters that determine this scale. The spatial scale of interaction is a  
38 fundamental property of any microbial system consisting of multiple genotypes  
39 because it defines the network of interactions that can occur.

40

## 41 **Results and Discussion**

42 The spatial scale over which individual cells interact can have a strong influence on  
43 cellular dynamics, as we show with a simple simulation of multiple genotypes that  
44 need to exchange essential metabolites in order to grow (Fig. 1a). This simulation  
45 reveals that the reproductive success of individuals is lower when interactions are  
46 limited to immediate neighbours (Fig. 1b) because often these neighbours are their  
47 kin. This effect becomes stronger when organisms depend on metabolites from more  
48 than one other cell type; a small range of interaction reduces the probability that all  
49 required partners are present in the interaction neighbourhood (Fig. 1b). These results  
50 indicate that collective metabolism might be hindered when interactions are short-  
51 ranged.

52

53 Our first goal was thus to quantify the spatial range of interaction between cells in a  
54 microbial system. We measured this range by growing a synthetic consortium in  
55 microfluidic chambers (Fig. 2b, Sup. Video S1) and quantifying how the growth rate  
56 of cells depends on the identity of their neighbours (Fig. 2c, Sup. Video S2). The  
57 synthetic consortium (Fig. 2a) is composed of two auxotrophic *Escherichia coli*  
58 strains that are unable to synthesize proline and tryptophan, respectively. Because  
59 cells naturally leak out amino acids (10, 11) a pair of auxotrophs can grow together by  
60 exchanging amino acids. In the absence of biological activity, amino acids would  
61 diffuse throughout the microfluidic chamber in less than a second to yield a  
62 homogenous environment; however cells can modify the local amino acid  
63 concentration and thereby influence their neighbours' growth.

64

65 To quantify the spatial range at which cells interact, we correlated the growth rates of  
66 individual auxotrophic cells with the presence of their complementary partner in the  
67 neighbourhood. Specifically, we measured the fraction of the complementary partner  
68 within a distance  $d$  from a cell's membrane, and determined the value of  $d$  that leads  
69 to the best prediction of the cell's growth rate. We call this distance the *interaction*  
70 *range*.

71

72 This analysis revealed that the interaction range is on the order of one cell length (Fig.  
73 3a). This is found consistently across ten biological replicates (~15,000 cells analyzed  
74 in total). Specifically, the interaction range of the tryptophan auxotroph cells is  
75  $3.2 \pm 0.4 \mu\text{m}$  (mean  $\pm$  standard error of the mean), while the interaction range of the  
76 proline auxotroph cells is  $12.1 \pm 0.5 \mu\text{m}$  (significantly larger,  $p < 10^{-5}$ , paired t-test,  
77  $n=10$ ). In other words, these cells live in a small world: they are only affected by a  
78 small group of individuals around them.

79

80 Our next goal was to identify the mechanisms that explain the small range of  
81 interaction. We addressed this question with an individual-based model (Fig. 4a). We  
82 assumed that the growth rate of auxotrophic cells is limited by the uptake of the  
83 amino acid that they need, and that cells take up amino acids actively and leak them  
84 passively. All model parameters are taken from literature, apart from the two leakage  
85 rates, which are estimated from the data (Supplementary Information). Our model  
86 predicts the individuals' growth given the combined activities of all the cells in the  
87 system and captures how growth depends on neighbourhood composition (Fig. 4c)  
88 and at what spatial scale (proline auxotroph:  $15.0 \mu\text{m}$  model,  $12.5 \mu\text{m}$  data,  
89 tryptophan auxotroph:  $3.0 \mu\text{m}$  model,  $3.2 \mu\text{m}$  data, Fig. 4b).

90

91 The model shows that the interaction range is set by fundamental biochemical  
92 parameters. In fact, the interaction range is directly proportional (Fig. 4e) to a second  
93 length scale, which we can calculate analytically: the *growth range*, the length scale  
94 describing the decrease in growth when the auxotrophs are arranged as in Fig. 4d.  
95 One can show that the growth range, and thus the interaction range between cells,  
96 depends more strongly on the amino acid uptake rate (square root dependence) than  
97 on the leakage rate (logarithmic dependence, Supplementary Information). The  
98 interaction range is generally small in systems where leakage is slow and uptake of

99 the exchanged compounds is fast compared to their diffusion (Fig. 4f). As the  
100 diffusion constant does not vary significantly for small molecules such as amino acids  
101 ( $D_{\Delta\text{trpC}}/D_{\Delta\text{proC}} \sim 0.75$ ), the interaction range is primarily modulated by the uptake rates  
102 ( $r_{\Delta\text{trpC}}^u/r_{\Delta\text{proC}}^u \sim 16$ ). Our modeling framework can be adapted to estimate the  
103 interaction range in other multi-genotype systems where the molecules mediating the  
104 interactions are taken up or degraded by individuals.

105

106 Next, we considered how this small interaction range affects community dynamics.  
107 Our communities show consistent dynamics: within about 25 hours all replicate  
108 communities reach a steady state composition where the tryptophan auxotroph is in  
109 minority (median fraction of total biomass = 0.23, Fig. 5a). This is in line with the  
110 growth dynamics that we measured at the single-cell level: to reach an equal growth  
111 rate of e.g. 0.1 per hour, the tryptophan auxotrophs need ~90% of the complementary  
112 partner within a small neighbourhood, while the proline auxotrophs need four times  
113 less within a much larger neighbourhood (Fig. 3c). The single cells' properties thus  
114 determine the community steady state.

115

116 Does the small interaction range that we measured in our experimental system limit  
117 the rate at which individual cells can grow? This question brings us back to our  
118 central hypothesis, that short-range interactions limit the exchange of resources and  
119 hinder collective metabolism. One would expect the individual cells in the multi-  
120 genotype system to grow faster if they would increase their mixing or their interaction  
121 range. We tested these predictions by applying our model to experimentally observed  
122 spatial arrangements. Specifically, the predicted average growth rate of individuals,  
123 and therefore the growth rate of the community as a whole, is higher when we  
124 randomize arrangements and disrupt kin clusters (Fig. 5b) or when we simulate an  
125 increase in the interaction range by lowering the uptake rates of amino acids (Fig. 5c).

126

127 While we expect that the spatial scale of interaction fundamentally affects the  
128 functioning and dynamics of any microbial multi-genotype system, the specific  
129 effects will depend on the nature of the interactions. For example, short-range  
130 interactions can stabilize the cooperative production of molecules, as they ensure that  
131 these molecules are only accessible to cells that also contribute to production, and  
132 inaccessible to non-producing individuals (12, 13). In contrast, short-range

133 interactions generally harm mutualistic cross-feeding communities (14), although they  
134 can have a stabilizing effect by preventing ecological invasion by non-contributing  
135 mutants (15).

136

137 The ecological and evolutionary outcome of cooperation and competition can change  
138 dramatically when interactions are limited to the local neighbourhood (9, 16, 17).

139 Quantifying the interaction range and linking it to biochemical parameters of the  
140 system is therefore essential for understanding the functionality and dynamics of  
141 microbial multi-genotype systems. We found that interaction ranges are small  
142 whenever the uptake or degradation of the molecules mediating the interaction is fast  
143 compared to their diffusion in the environment, and when the density of individuals is  
144 high. We thus expect interactions to be local in dense microbial systems where cells  
145 interact through the exchange of cellular building blocks, quorum sensing molecules  
146 and metabolites that bind (18) or digest extracellular nutrients. Our work  
147 demonstrates that the spatial arrangement of organisms can significantly impact the  
148 functioning of microbial systems when the spatial scale of interaction is small.  
149 Knowing at which scale organisms interact is crucial for understanding and  
150 controlling natural communities, and for engineering microbial systems for desired  
151 purposes.

## Methods

### 152 Strains

153 All experiments were performed using strains derived from MG1655; these strains are  
154  $\Delta$ trpC-GFP (MG1655 *trpC::frt*, PR-*sfGFP*),  $\Delta$ trpC-RFP (MG1655 *trpC::frt*, PR-  
155 *mCherry*),  $\Delta$ proC-GFP (MG1655 *proC::frt*, PR-*sfGFP*), and  $\Delta$ proC-RFP (MG1655  
156 *proC::frt*, PR-*mCherry*). The  $\Delta$ trpC strains are unable to produce proline due to a  
157 deletion in *proC*, the  $\Delta$ trpC are unable to produce tryptophan due to a deletion in  
158 *trpC*(19). The auxotrophic strains were made by transferring the respective  
159 kanamycin cassettes from the keio-collection (20) into TB204 and TB205 from the  
160 lab strain collection using lambda Red mediated recombination (21). TB204 and  
161 TB205 are *E. coli* MG1655 derivatives that constitutively express sfGFP or mCherry  
162 under the PR promoter from the chromosome. In brief, the kanamycin cassette  
163 including the homologous flanking regions were amplified by PCR from JW0377  
164 (*proC::kan*) and JW1254 (*trpC::kan*) and transformed into TB204 and TB205  
165 harbouring the pSim8 plasmid (kindly provided by Donald L. Court). Primer  
166 sequences used:

167 U\_proC\_fw: CAT AAA GTC ATC CTT TGT TGG G

168 D\_proC\_rv: CTT TAC GGA TTA GTG TGG GG

169 U\_trpC\_fw: AAC GTC GCC ATG TTA ATG CG

170 D\_trpC\_rv: GAA CTG AGC CTG AAA TTC AGG

171 The kanamycin cassette was transferred into a fresh strain of TB204 or TB205 using  
172 P1 mediated generalized transduction. Upon successful transduction, the phenotypes  
173 of the strains were confirmed (no growth without proline or tryptophan) and the  
174 kanamycin cassettes removed from the genome using the FLP-recombinase from  
175 plasmid pCP20(21). We confirmed the ability of our two auxotrophs to grow together  
176 by receiving the amino acid they cannot produce from their partner, as reported in  
177 previous work(19).

178

### 179 Media and growth condition

180 Monocultures of the two auxotrophs strains were started from a single colony taken  
181 from a LB-agar plate and were grown overnight at 37°C in a shaker incubator. The  
182 cells were growing overnight in M9 medium (47.76 mM Na<sub>2</sub>HPO<sub>4</sub>, 22.04 mM  
183 KH<sub>2</sub>PO<sub>4</sub>, 8.56 mM NaCl and 18.69 mM NH<sub>4</sub>Cl) supplemented with 1mM MgSO<sub>4</sub>, 0.1

184 mM CaCl<sub>2</sub>, 0.2% glucose (all from Sigma-Aldrich), 50 µg/L of L-proline (434 mM)  
185 and 20 µg/L L-tryptophan (98 mM) and 0.1% Tween-20 (added to facilitate loading  
186 of cells in microfluidic device). Cells were loaded in stationary phase in a  
187 microfluidic device and grown in the same media. After approximately 10 hours, cells  
188 exit lag phase and started to fill the chambers. The medium was then switched to M9  
189 medium + 0.2% glucose + 0.1% Tween-20 with no amino acids. The medium was fed  
190 at a flow rate of 0.5 ml/h for the whole duration of experiment (approximately three  
191 days). Imaging was started three hours before switching to this medium, to have a  
192 control of the cell's growth with amino acids in the medium.

193

### 194 **Microfluidic experiment**

195 The microfluidic devices consisted of chambers of 60x60 µm and 0.76 µm in height  
196 facing a feeding channel of 22 µm in height and 100 µm wide. Masks for  
197 photolithography were ordered at Compugraphics (Jena, Germany). A two-step  
198 photolithography was used to make SU8 molds on silicon wafers.  
199 Polydimethylsiloxane (PDMS, Sylgard 184 Silicone Elastomer Kit, Dow Corning)  
200 was mixed in a ratio of 1.5:10 and poured on the dust-free wafer, degassed in a  
201 desiccator for 30 minutes, and baked for around one hour at 80°C for curing. PDMS  
202 chips of approximately 2 cm×3.5 cm were cut out around the structures on the wafer.  
203 Holes for medium supply and outlet were punched (diameter of holes 1.2 mm).  
204 PDMS chips were bound to round (50 mm diameter) glass coverslips (Menzel-Gläser,  
205 Braunschweig, Germany) by treating them for 30 seconds at maximum power in a  
206 Plasma Cleaner (PDC-32G-2, Harrik Plasma, New York, USA), and left on a heated  
207 plate at 100°C for one minute for binding. Before an experiment, a small amount of  
208 medium was flushed into the channels using a pipette to wet the chambers. Then air  
209 was pushed through the main channel (medium remains in chambers). Cells in  
210 stationary phase, from overnight culture (14 h approximately) were concentrated  
211 approximately 100 times by centrifugation (5,000×g, 5 min.) and loaded into the chip  
212 using a pipette. Cells were pushed in the side chambers with the help of small air  
213 bubbles flowing through the main channel. Once a sufficient number of cells were  
214 pushed inside the chambers, fresh medium was pumped through the flow channel. For  
215 all experiments, syringe pumps (NE-300, NewEra Pump Systems) with 50 ml  
216 syringes containing the medium were used. Tubing (Microbore Tygon S54HL, ID  
217 0.76 mm, OD 2.29 mm, Fisher Scientific) was connected to the syringes using 20G



218 needles (0.9 mm×70 mm), which were directly inserted into the tubing. Smaller  
219 tubing (Teflon, ID 0.3 mm, OD 0.76 mm, Fisher Scientific) was then inserted into the  
220 bigger tubing and directly connected to the inlet holes in the PDMS chip. Medium  
221 switches were performed by disconnecting the bigger tubing from the syringe and  
222 reconnecting it to new syringes. All experiments were run at a flow rate of 0.5 ml/h.  
223 The flow rate is high enough that amino acids do not accumulate in the feeding  
224 channel and are not exchanged via the main channel. In fact no growth was observed  
225 in chambers hosting only one of the two auxotrophs during the whole duration of the  
226 experiment.

227

## 228 **Microscopy**

229 Time-lapse microscopy was done using fully automated Olympus IX81 inverted  
230 microscopes (Olympus, Tokyo, Japan). Images were taken using a 100X NA1.3 oil  
231 objective (Olympus) with 1.6X manual auxiliary magnification and an ORCA-flash  
232 4.0 v2 sCMOS camera (Hamamatsu, Hamamatsu, Japan). Fluorescent imaging was  
233 done using a X-Cite120 120 Watt high pressure metal halide arc lamp (Lumen  
234 Dynamics, Mississauga, Canada) and Chroma 49000 series fluorescent filter sets  
235 (N49002 for GFP and N49008 for RFP, Chroma, Bellows Falls, Vermont). Focus was  
236 maintained using the Olympus Z-drift compensation system and the entire setup was  
237 controlled with Olympus CellSens software. The sample was maintained at 37°C with  
238 a microscope incubator (Life imaging services, Basel, Switzerland). Several positions  
239 were imaged on the same microfluidic device and images were taken every ten  
240 minutes.

241

## 242 **Image analysis**

243 All image processing was done using Matlab (version 2016A and newer, MathWorks,  
244 Natick, Massachusetts) and Vanellus software (credit D. J. Kiviet, accessible at:  
245 <http://kiviet.com/research/vanellus.php>). Time-lapse frames were first registered and  
246 cells were then segmented using customized segmentation algorithms. Two different  
247 algorithms for segmentation were used: the '*segmentation of biomass algorithm*' and  
248 the '*segmentation of cells algorithm*'. The '*segmentation of biomass algorithm*'  
249 identifies the green and red biomass in the chamber: images were first cropped along  
250 the profile of the microfluidic chambers (up to 5 micrometers from the outlet), and  
251 biomass was segmented on the phase contrast image and assigned to its relative

252 colour after deconvolution; the algorithm was optimized to give the most accurate  
253 estimation of the area occupied by cells of each type and not to segment the single  
254 individuals. The '*segmentation of cells algorithm*' identifies individual cells for  
255 subsequent single cell growth estimation (elongation rate). In this case, cells were  
256 segmented on the green or the red fluorescent image, according to their fluorescence  
257 colour. Single cell location was tracked using an optical flow based algorithm  
258 (described below) and the tracking was manually corrected to prevent mistakes.  
259 Subparts of the chambers were randomly selected for the single cell segmentation and  
260 tracking and 250 cells per chamber were analyzed on average, giving a total of 15,475  
261 cells across 61 chambers. The area close (within 5  $\mu\text{m}$ ) to the open end of the  
262 chamber was not considered for analysis as amino acid concentrations in this area are  
263 lower because they are washed out into the main flow channel. The tracking  
264 algorithm based on optical flow can be described in three steps: 1) estimate vector  
265 field of movement  $M$  between subsequent segmented images  $S_1$  and  $S_2$  using  
266 Farneback(22) algorithm 2) back-transform the second image  $S_{2,backtransformed} = -M \cdot$   
267  $S_2$ , to obtain a prediction of how  $S_1$  should look like based on the vector field of  
268 motion 3) for each cell in  $S_1$  determine the area overlap with cells in  $S_{2,backtransformed}$ ;  
269 cells in  $S_1$  are tracked to cells in  $S_2$  based on maximum overlap area.

270

### 271 **Cell elongation rate**

272 Cell elongation rates were calculated by fitting the exponential curve  $L(t)=L(0) 2^{u \cdot t}$  to  
273 the cell length  $L$  over time. The fitting was done using a linear fit on the logarithm of  
274 the cell length over a sliding time window of 5 time-points (40 minutes). Length of a  
275 cell was measured as the length of the major axis of the ellipse that approximates the  
276 cell, i.e. the ellipse that has the same normalized second central moments as the cell.

277

### 278 **Correlation analysis**

279 We quantified the composition of the neighbourhood of a focal cell as the fraction of  
280 the other complementary partner present in that neighbourhood, e.g. in the case of the  
281 tryptophan auxotroph we quantified the fraction  $\Delta\text{proC}/(\Delta\text{proC}+\Delta\text{trpC})$ .  $\Delta\text{trpC}$  and  
282  $\Delta\text{proC}$  are the areas (in pixel) occupied by each auxotroph, therefore they are a  
283 measurement of biomass and not of cell number. To calculate the fraction above, we  
284 first identified biomass of the two types as described in the image analysis section;  
285 then we calculated the area in pixel that each cell type occupies within increasing

286 distances from the focal cell's perimeter. For a given distance, we plotted the fraction  
287 (x-axis) against the growth rate (y-axis) for all cells and we calculated Spearman's  
288 rank correlation coefficient (no assumption on the functional relationship between  
289 variables). The correlation coefficient is maximal at a specific distance, which we call  
290 interaction range. We use linear regression to characterize the relationship between  
291 the growth rate of the cells and the fraction of the amino acid producing partner  
292 present within the estimated interaction range. For figure 3a, the correlation is  
293 calculated as Spearman  $\rho$  on 2,610 data points for proline auxotrophs and 2,162 for  
294 tryptophan auxotrophs, both from four biological replicates. The same correlation  
295 analysis performed when cells are fed amino acids shows that growth does not depend  
296 on the neighbours when amino acids are present in the medium (see Supplementary  
297 Data).

298

### 299 **Individual-based model**

300 We consider two cell types living on a on a 40x40 squared grid: Type A can only  
301 produce amino acid 1 while Type B can only produce amino acid 2. The growth of  
302 type A is thus limited by the supply of amino acid 2 leaked by type B cells and vice  
303 versa. We make the following assumptions:

304 a) Cells can maintain a constant internal concentration  $I$  of the amino acid they can  
305 produce.

306 b) Growth of a cell is limited only by the amino acid the cell cannot produce; growth  
307 is modeled using the Monod equation (23)  $\mu = \mu^{max} I / (I + K)$ , where  $K$  is the  
308 concentration at which cells grow at half maximum speed.

309 c) Both cell types have the same maximum growth rate  $\mu^{max}$ .

310 d) Cells take up amino acids actively (10), and the process is approximated with  
311 linear kinetics:  $inflow = r^u E$ , where  $r^u$  is the uptake rate and  $E$  is the external  
312 concentration. Linear kinetics approximates Monod kinetics if the concentration of  
313 external amino acids  $E$  are low.

314 e) Cells leak amino acids through passive diffusion through the cellular membrane  
315 (10)  $outflow = r^l (I - E)$ , where  $r^l$  is the leakage rate.

316 f) Diffusion in the extracellular environment is modeled as diffusion in a crowded  
317 environment (24)  $D^{eff} = D(1 - \rho)/(1 + \rho/2)$ , where  $D$  is the diffusion constant  
318 and  $\rho$  the cell density.

319 g) The ratio between the volume inside a cell and the available volume outside of a  
320 cell is constant and equal to  $\alpha = \rho / (1 - \rho)$ .

321 With these assumptions, we can write the following equations for the internal  
322 concentration of amino acids for a cell of type A - which produces amino acid 1, and  
323 not amino acid 2:

324

$$\frac{\partial I_1}{\partial t} = 0$$

$$\frac{\partial I_2}{\partial t} = r_2^u E_2 - r_2^l (I_2 - E_2) - I_2 \mu^{max} I_2 / (I_2 + K_2)$$

325

326 and for type B -which produces amino acid 2 and not 1:

327

$$\frac{\partial I_2}{\partial t} = 0$$

$$\frac{\partial I_1}{\partial t} = r_1^u E_1 - r_1^l (I_1 - E_1) - I_1 \mu^{max} I_1 / (I_1 + K_1)$$

328

329 The external concentration of each amino acid is:

$$\frac{\partial E_i}{\partial t} = -\alpha r_i^u E_i + \alpha r_i^l (I_i - E_i) + D_i^{eff} \nabla^2 E_i$$

330

331 Some parameters can be eliminated by expressing the concentrations of amino acid  $i$   
332 in units of  $K_i$ , time in units of  $1/\mu^{max}$ , and space in units of cell size. This gives a set  
333 of dimensionless equations with a reduced number of parameters (Supplementary  
334 Information). The other parameters are taken from literature or measured, with the  
335 exception of the leakage rates, which are estimated from data. These equations can be  
336 used to predict cells' growth rates in real or artificial arrangements of the two cell  
337 types. For detail about the numerical solution see Supplementary Information.

338

### 339 **Cellular automaton**

340 The cellular automaton models a system of two or more types of organisms that live  
341 on a grid and benefit from the presence of the other types. The model rests on two  
342 assumptions: 1) individuals place offspring close to themselves; 2) reproductive

343 success of individuals depends on the fraction of neighbours of the other type within  
344 the interaction range, the sole parameter in the model.

345 An operative description of the cellular automaton follows: individuals live in space,  
346 each occupying a site on a 40x40 grid; each site has 8 adjacent sites on the grid  
347 (Moore neighbourhood) and boundary condition wrap the grid into a Torus. For the  
348 two type communities, there are individuals of types 0 and 1. At every time step an  
349 individual dies at a random location on the grid and it is replaced with an individual  
350 of type 0 or 1. It will be of type 0 with probability  $P(0)$ :

351

$$P(0) = \frac{\sum_i^{\text{adjacent individuals}} \delta_i \text{Reproductive success}_i}{\sum_i^{\text{adjacent individuals}} \text{Reproductive success}_i}$$

352

353 where  $\delta_i$  is the Dirac delta function, which is one if grid site  $i$  contains type 0 and zero  
354 otherwise. The reproductive success of each individual  $i$  is:

355

$$\text{Reproductive success}_i = \frac{\text{number of neighbors of the other type}}{\text{number of neighbors}}$$

356

357 Individuals interact with all other individuals within a neighbourhood of range  $R$  (a  
358 square-shaped neighbourhood). For communities with more than two types, the  
359 reproductive success is the fraction of neighbours that is most rare in the  
360 neighbourhood:

361

$$\text{Reproductive success}_i = \frac{\text{number of neighbors of the rarest type}}{\text{number of neighbors}}$$

362

363 All the rest is easily extended from the two types community described above to  
364 communities of more than two types. To compare systems with a different number of  
365 types, the reproductive success is normalized by the reproductive success the systems  
366 has in well mixed conditions ( $R \rightarrow \infty$ ), which is 1/2 for two types, 1/3 for three and  
367 1/4 for four.

368 Starting from different initial configurations and varying proportions of the types, we  
369 let the system evolve and stop the simulation after the system has attained a  
370 dynamical equilibrium where the average reproductive success of individuals remains

371 approximately constant. Average steady state reproductive success result from 100  
372 independent runs of the cellular automaton. The cellular automaton is implemented in  
373 C++.

374

### 375 **Dataset and statistical analysis**

376 The dataset consists of 15,475 cells, from 61 communities, grouped into ten biological  
377 replicates including both fluorescent label combinations. Four biological replicates  
378 were done with  $\Delta\text{trpC-GFP}$  and  $\Delta\text{proC-RFP}$  (consortium 1) and six were done with  
379  $\Delta\text{trpC-RFP}$  and  $\Delta\text{proC-GFP}$  (consortium 2). Each biological replicate corresponds to  
380 one channel in a microfluidic chip and for each channel on average 6 chambers were  
381 analyzed (range: 3-9). Inside each chamber, on average 250 cells were tracked in time  
382 (see Image Analysis section). The experiments were performed in three different  
383 weeks (different microfluidic chips and different batch of media). The interaction  
384 range and relation between growth and neighborhood were estimated separately for  
385 consortium 1 and 2. The interaction ranges are consistent for the two consortia (Fig.  
386 3a shows consortium 1, Fig. S5a shows consortium 2), but the fluorescent label affect  
387 the growth rate to some extent: the  $\Delta\text{trpC-RFP}$  grows generally slower than the  
388  $\Delta\text{trpC-GFP}$  (Fig. 3b-c shows consortium 1, Fig. S5b-c consortium 2). To assess the  
389 variability of the estimate of the interaction range, we repeated the analysis for each  
390 replicate in isolation (results are shown in Fig. 3b).

391

### 392 **Acknowledgements**

393 We thank Andrea Cavagna for discussing the correlation analysis, Glen D'Souza for  
394 advise on the biological assumptions of the model, Gabriele Micali, Roman Stocker,  
395 and Michael Doebeli for comments on the model, and Charlotte Brannon for  
396 comments on the manuscript. The research was supported by funding from the Swiss  
397 National Science foundation (grants no. 31003A\_149267 and 31003A\_169978 to  
398 MA), by an ETH fellowship to DJK, by an Early Postdoc Mobility fellowship from  
399 the Swiss National Science Foundation to SVV (grant no. 175123), by ETH Zurich  
400 and Eawag.

401

### 402 **Author Contributions**

403 ADC and MA conceived the research, ADC performed the experiment with  
404 contributions of SVV, ADC analyzed the data with contributions of DJK and SVV,

405 SVV and ADC conceptualized the individual-based model and SVV implemented it,  
406 SS constructed the bacterial strains, DJK constructed the microfluidic device, ADC  
407 wrote the manuscript with contributions of MA and SVV.

408

#### 409 **Competing interest declaration**

410 The authors declare no competing interests.

411

#### 412 **Data and materials availability**

413 The data of this study are available from the corresponding author upon request.

414

#### 415 **References:**

- 416 1. Horner-devine MC, Carney KM, Bohannan BJM (2004) An ecological  
417 perspective on bacterial biodiversity. *Proceeding R Soc* 271:113–122.
- 418 2. Falkowski PG, Fenchel T, Delong EF (2008) The Microbial Engines That  
419 Drive Earth’s Biogeochemical Cycles. *Science (80- )* 320(5879):1034 LP-1039.
- 420 3. Cordero OX, Datta MS (2016) Microbial interactions and community assembly  
421 at microscales. *Curr Biol* (31):227–234.
- 422 4. Gilbert JA, Henry C (2015) Predicting ecosystem emergent properties at  
423 multiple scales. *Environ Microbiol Rep* 7(1):20–22.
- 424 5. Phelan V, Liu W-T, Pogliano K, Derrestein PC (2013) Microbial metabolic  
425 exchange - the chemotype-to-phenotype link Vanessa. *Nat Chem Biol* 8(1):1–  
426 22.
- 427 6. D’Souza G, et al. (2014) Less is more: Selective advantages can explain the  
428 prevalent loss of biosynthetic genes in bacteria. *Evolution (N Y)* 68(9):2559–  
429 2570.
- 430 7. Mee MT, Collins JJ, Church GM, Wang HH (2014) Syntrophic exchange in  
431 synthetic microbial communities. *Proc Natl Acad Sci U S A* 111(20):E2149-56.
- 432 8. Schink B (2002) *Schink B.. Synergistic interactions in the microbial world.*  
433 *Antonie Van Leeuwenhoek Int J Gen Mol Microbiol* 81: 257-261.
- 434 9. Nadell CD, Drescher K, Foster KR (2016) Spatial structure, cooperation and  
435 competition in biofilms. *Nat Rev Microbiol* 14:589.
- 436 10. D’Souza G, et al. (2018) Ecology and evolution of metabolic cross-feeding  
437 interactions in bacteria. *Nat Prod Rep* 35:455–488.
- 438 11. Morris JJ (2015) Black Queen evolution : the role of leakiness in structuring

- 439 microbial communities. *Trends Genet* 31(8):475–482.
- 440 12. Drescher K, Nadell CD, Stone HA, Wingreen NS, Bassler BL (2014) Report  
441 Solutions to the Public Goods Dilemma in Bacterial Biofilms. *Curr Biol*  
442 24(1):50–55.
- 443 13. Hol FJH, et al. (2013) Spatial Structure Facilitates Cooperation in a Social  
444 Dilemma : Empirical Evidence from a Bacterial Community. 8(10):2–11.
- 445 14. Muller MJI, Neugeboren BI, Nelson DR, Murray AW (2014) Genetic drift  
446 opposes mutualism during spatial population expansion. *Proc Natl Acad Sci*  
447 111(3):1037–1042.
- 448 15. Momeni B, Waite AJ, Shou W (2013) Spatial self-organization favors  
449 heterotypic cooperation over cheating. *Elife* 2(2):1–18.
- 450 16. Mitri S, Xavier JB, Foster KR (2011) Social evolution in multispecies bio fi  
451 lms. *PNAS* 108:10839–10846.
- 452 17. Oliveira NM, Niehus R, Foster KR (2014) Evolutionary limits to cooperation  
453 in microbial communities. (7). doi:10.1073/pnas.1412673111.
- 454 18. Davies DG, Geesey GG (1995) Regulation of the alginate biosynthesis gene  
455 algC in *Pseudomonas aeruginosa* during biofilm development in continuous  
456 culture. *Appl Environ Microbiol* 61(3):860–867.
- 457 19. Marchal M, et al. (2017) A passive mutualistic interaction promotes the  
458 evolution of spatial structure within microbial populations. *BMC Evol Biol*  
459 17:106.
- 460 20. Baba T, et al. (2006) Construction of *Escherichia coli* K-12 in-frame, single-  
461 gene knockout mutants: The Keio collection. *Mol Syst Biol* 2.  
462 doi:10.1038/msb4100050.
- 463 21. Datsenko KA, Wanner BL (2000) One-step inactivation of chromosomal genes  
464 in *Escherichia coli* K-12 using PCR products. *Proc*  
465 *Natl Acad Sci* 97(12):6640 LP-6645.
- 466 22. Farneback G (2003) Two-frame motion estimation based on polynomial  
467 expansion. *Image Anal Proc* 2749(1):363–370.
- 468 23. Monod J (1949) The Growth of Bacterial Cultures. *Annu Rev Microbiol*  
469 3(1):371–394.
- 470 24. Lebenhaft JR, Kapral R (1979) Diffusion-controlled processes among partially  
471 absorbing stationary sinks. *J Stat Phys* 20(1):25–56.



## Figures and Figure Legends

**Fig. 1**

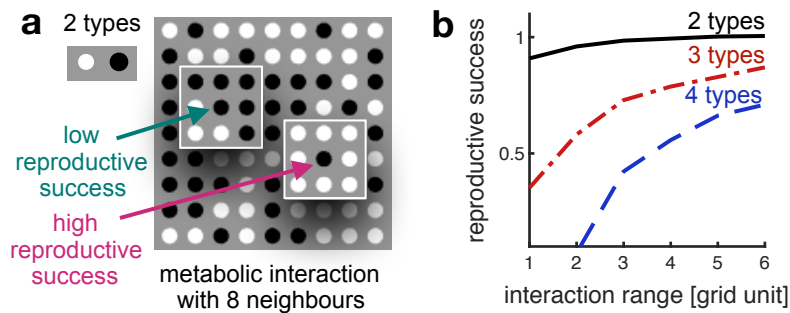

472 **Fig. 1: Interacting locally lowers reproductive success.** **a** Cells (black or white  
473 dots) exchange compounds to reproduce, and place offspring on adjacent sites.  
474 Reproductive success is maximal for cells that are surrounded by the other type. **b**  
475 The average reproductive success of individuals is lower in systems with smaller  
476 interaction range.

**Fig. 2**

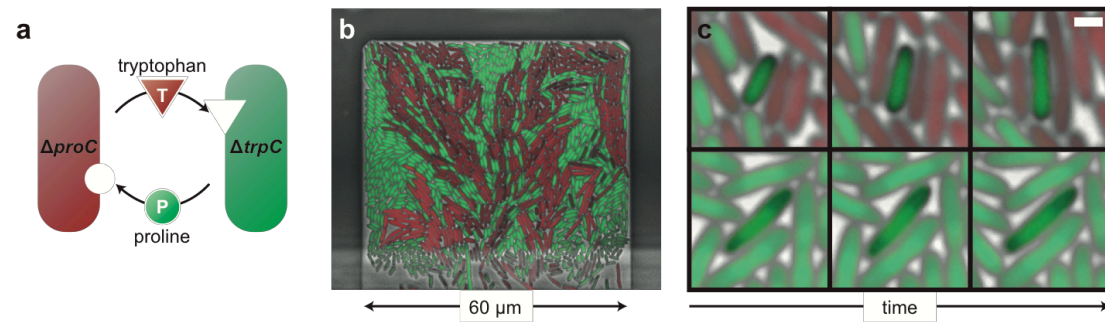

477 **Fig. 2: Measuring the spatial range of cell-to-cell interaction.** a Synthetic consortia  
478 of two auxotroph mutants of *E. coli* that depend on each other and that are labeled  
479 with constitutively expressed green and red fluorescent proteins. b Microfluidic  
480 chamber hosting ~1400 cells in a monolayer. Continuous flow of culture media at the  
481 bottom of the chamber removes cells as soon as they are pushed out of the chamber. c  
482 Auxotrophic cells surrounded by the complementary partner (top row) grow faster  
483 than auxotrophic cells surrounded by their own type (bottom row). Scale bar 1  $\mu m$ .  
484

**Fig. 3**

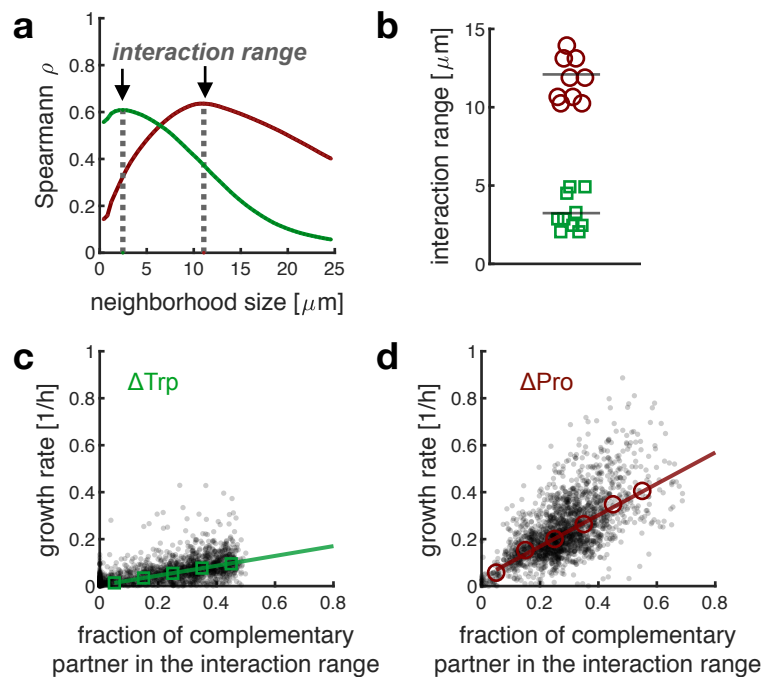

485 **Fig. 3: Individuals interact at a short spatial range.** **a** We calculated the correlation  
486 coefficients between the growth rates of individual cells and the fraction of the  
487 complementary partner in a given neighborhood size. When we plot the correlation  
488 coefficient as a function of the neighborhood size, we observe that the strength of the  
489 correlation is maximal for an intermediate neighborhood size (marked by dashed  
490 lines); we call this neighborhood size the interaction range. **b** Proline (red) and  
491 tryptophan (green) auxotrophs have different interaction ranges (10 biological  
492 replicates, ~15,000 cells total). **c-d** Both auxotrophic cells grow faster when  
493 surrounded by the complementary partner within the interaction range. Tryptophan  
494 auxotrophs (c) generally have lower growth rates than proline auxotrophs (d), as  
495 shown by the slopes of the linear regression (0.75 for  $\Delta\text{proC}$  and 0.21 for  $\Delta\text{trpC}$ ).  
496 Black dots: single cells (2,610  $\Delta\text{proC}$  and 2,162  $\Delta\text{trpC}$  cells); Open symbols: binned  
497 median values; lines: linear regression on binned values.

**Fig. 4**

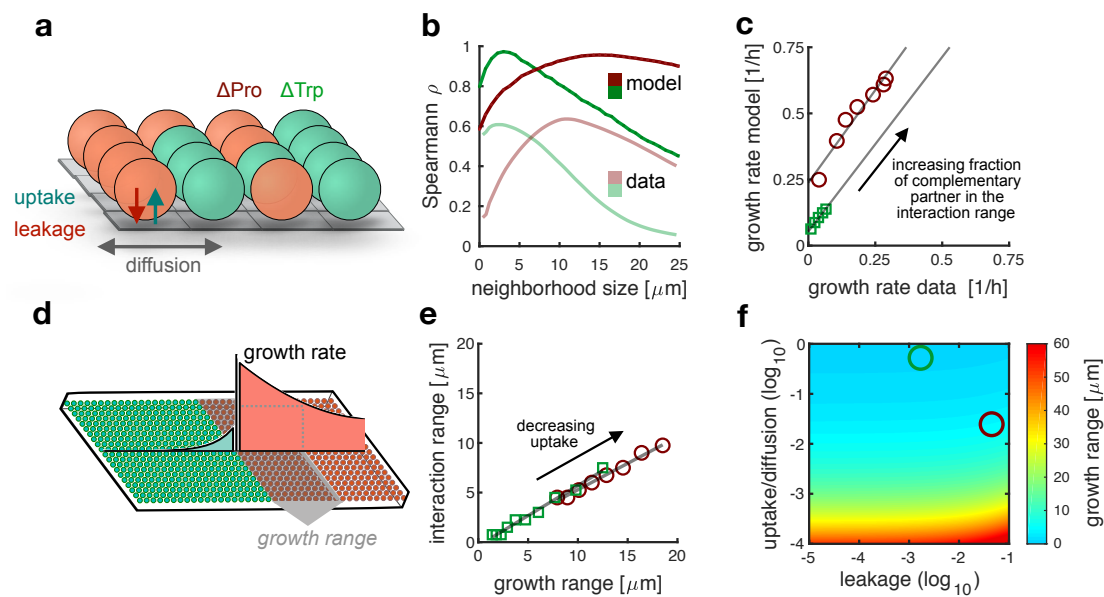

498 **Fig. 4: Mathematical model shows mechanism of local interactions.** **a** Individual-  
 499 based model where amino acids are actively taken up and passively leaked.  
 500 Tryptophan auxotrophs are shown in green and proline auxotrophs in red in all panels.  
 501 **b** The model (dark curves) predicts the empirical correlation analysis (light curves,  
 502 identical to those in Fig. 3a). **c** The predicted and experimentally measured growth  
 503 rates are strongly correlated. We grouped cells based on the fraction of the  
 504 complementary partner in their interaction range and for each group we compared the  
 505 measured growth rate (x-axis, same data as Fig. 3c-3d) to the predicted growth rates  
 506 (y-axis). Each symbol represents a single group. **d** For a symmetric arrangement with  
 507 a straight interface between the two types, we can analytically calculate the range  
 508 (shown in grey) in which the cellular growth rate is at least half of the maximal  
 509 growth rate observed at the interface; we call this range the growth range. The growth  
 510 range can be calculated from biochemical parameters. **e** The interaction range is  
 511 proportional to the growth range. When we decrease, in the model, the rate at which  
 512 cells take up amino acids, the growth range and the interaction range increase; circles  
 513 show combinations of growth range and interaction ranges for different values of the  
 514 uptake rate of amino acids. **f** Growth range as a function of leakage and uptake rate  
 515 (relative to maximum growth rate and diffusion constant respectively). Growth range  
 516 (and interaction range) of the tryptophan auxotroph (green circle) and proline  
 517 auxotroph (red circle) are small.

**Fig. 5**

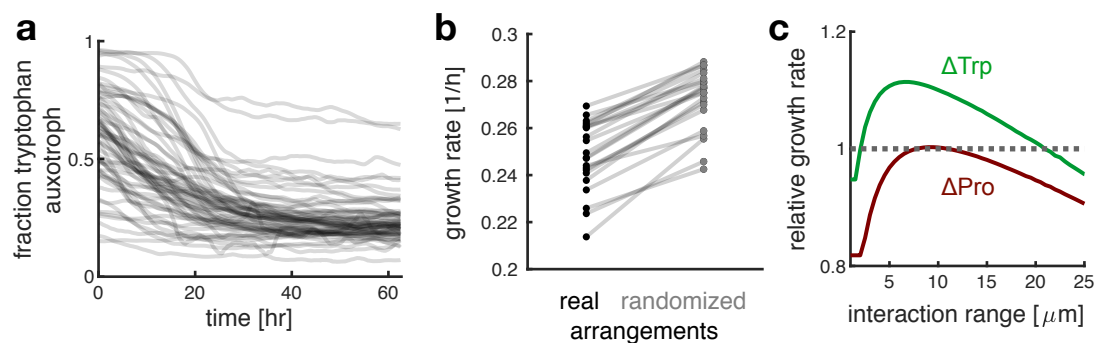

518 **Fig. 5: The short interaction range reduces growth of the whole microbial**  
519 **system.** **a** Communities equilibrate at compositions of 23% (median, n=61) of the  
520 tryptophan auxotrophs; deviations are due to large clusters of tryptophan auxotrophs  
521 in the back of the chamber. **b** Randomizing community arrangements leads to higher  
522 mixing and higher predicted average growth rates (n randomization = 20,  $p < 10^{-5}$ ,  
523 paired t-test, n=22); **c** The model predicts an increase in the average growth rate when  
524 the interaction range increases (as a consequence of a decrease in the uptake rate).  
525 When the uptake rate is very low and the interaction range therefore very large, amino  
526 acids diffuse out of the chamber and the growth rate decreases.

## Supplementary Information

### Contents

|                                                                           |    |
|---------------------------------------------------------------------------|----|
| 1. Supplementary discussion                                               | 23 |
| 1.1. Independence of growth from neighbours when amino acids are supplied | 23 |
| 1.2. Robustness of interaction range estimate to spatial arrangement      | 23 |
| 1.3. Limitation to the prediction of growth rates                         | 24 |
| 1.4. Tradeoff in uptake rates of amino acids                              | 25 |
| 1.5. Additional data                                                      | 25 |
| 2. Individual-base model                                                  | 26 |
| 2.1. Rescaled equations                                                   | 26 |
| 2.2. Steady state equations                                               | 28 |
| 2.3. Numerical solution and boundary condition                            | 29 |
| 2.4. Analytical limits                                                    | 29 |
| 2.5. Discussion on the effect of parameters                               | 34 |
| 3. Supplementary methods                                                  | 35 |
| 3.1. Proportionality of analytical growth range and interaction range     | 35 |
| 4. Supplementary Tables                                                   | 36 |
| 5. Captions for Movies                                                    | 36 |
| 6. References                                                             | 36 |

527

## 1. Supplementary discussion

528 **1.1. Independence of growth from neighbours when amino acids are supplied.** We  
529 verified that growth of auxotrophic cells does not depend on the identity of their neighbours  
when amino acids are externally supplied (Figure S2a and S2b).

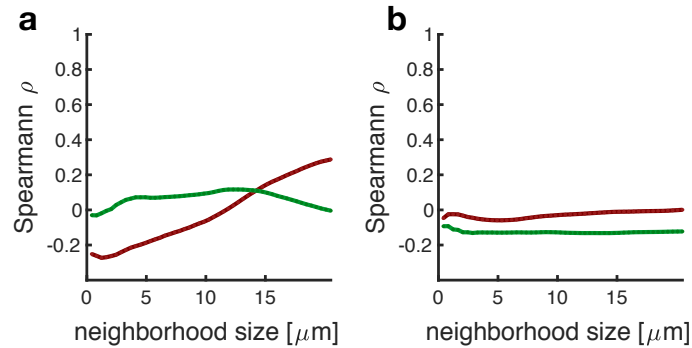

Figure S2. **Growth does not depend on the identity of neighbours when amino acids are fed.** When media is supplemented with proline and tryptophan, growth of auxotrophic cells does not depend on the presence of the complementary partner. The correlation is low for all distances analysed. Panel (a) shows results for consortia 1, panel (b) for consortia 2. Proline auxotroph (red), tryptophan auxotroph (green).

530

531 **1.2. Robustness of interaction range estimate to spatial arrangement.** The model  
532 allowed us to verify that the interaction range we measure does not arise from the spatial  
533 arrangements we analyse, but is rather a property of the system. Generally, inside the  
534 communities, the two cell types display different typical patch sizes, with the  $\Delta trpC$   
535 (the auxotroph that has the smaller interaction range) forming smaller patches. This  
536 observation raises the question: is our correlation analysis affected by patch size? We  
537 tested whether patch size affects our estimate of the interaction range by generating  
538 several synthetic datasets, each with 100 configurations of the two types arranging in  
539 patches of controlled sizes (Figure S3a); we analysed these synthetic datasets in the  
540 same way as our empirical dataset (Figure S3b and S3c). The results confirmed that  
541 the interaction range of each type, i.e. the location of the correlation peak in Figure  
542 3a, is robust to changes in patch size (Figure S3d). In particular, we can show that the

543 location of the peak does not change more than 30% for a range of patch sizes which are  
544 typically observed in the data (visual inspection). This result supports that our analysis  
545 of correlation between growth rates of individuals and their neighbourhood composition  
546 is a valid method to determine how cells affect each other's growth within complex  
547 spatial arrangements.

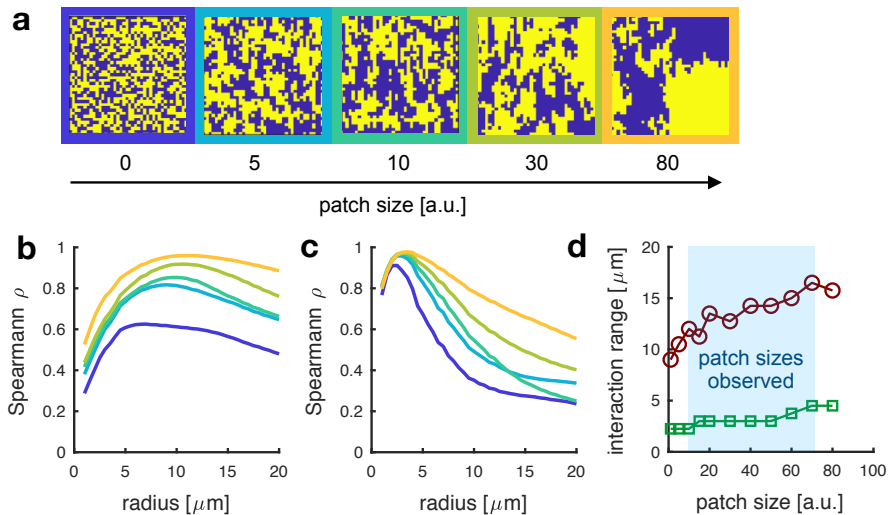

Figure S3. **Robustness of interaction range estimate to spatial arrangement of types.** (a) Examples of artificial arrangements with controlled patch size; dataset of 100 different arrangements per patch size were generated and analysed. The shape of the correlation curve changes for both tryptophan (b) and proline (c) auxotrophs but the interaction range changes only minimally (d) for the range of patch size typically observed in the data. Proline auxotroph (red circles), tryptophan auxotroph (green squares).

548 **1.3. Limitation to the prediction of growth rates.** The model recapitulates quantitatively  
549 the effect of spatial arrangement on growth (Fig. 4c - linear correlation between binned  
550 growth rates predicted by the model and measured in the data  $R^2 > 0.96$ ), However,  
551 the model tends to overestimate the absolute growth rate of cells (Fig. 4c displays an  
552 intercept). In fact, the classical Monod equation does not consider that cells may need  
553 substrate (the limiting amino acid here) even when they do not grow. For this reason,  
554 the original Monod equation is often modified by introducing a term of maintenance (1).



555 A more refined model including a growth cost could improve the estimation of growth  
556 rates; we keep this for future studies.

557 **1.4. Tradeoff in uptake rates of amino acids.** High uptake rates of metabolites like  
558 amino acids seem advantageous for the growth of individual cells, however they are  
559 not for the whole community: high uptake rates hinder metabolic exchange between  
560 different genotypes and thus reduce overall growth. Our simulations (Fig. 5c) show that  
561 the average growth of the two auxotrophs increases when the interaction range increases  
562 (by lowering the uptake rates of amino acids). However, there is a tradeoff: when uptake  
563 rates are too low, the average growth of the auxotrophs decreases because amino acid  
564 diffuse out of the chamber (Fig. 5c). We can show that in closed systems, where amino  
acids cannot diffuse away, growth does not decrease (Fig S4)

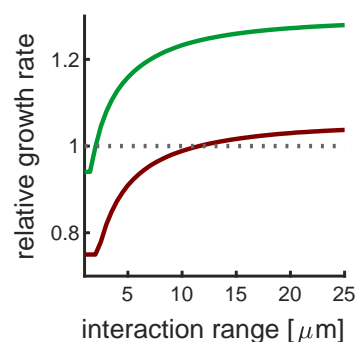

Figure S4. **Lower uptake rates lead to higher growth when amino acids cannot diffuse away from the community.** When simulating systems with closed boundaries, the growth rate of the two auxotrophs increases with increasing interaction range (decreasing uptake rates). Proline auxotroph (red), Tryptophan auxotroph (green).

565

566 **1.5. Additional data.** Figure S5 show the correlation analysis between single cells  
567 growth rates and fraction of the complementary partner in the interaction range for six  
568 biological replicates done with  $\Delta trpC$ -RFP and  $\Delta proC$ -GFP (consortium 2); figure 3  
569 in the main text shows four biological replicates done with  $\Delta trpC$ -GFP and  $\Delta proC$ -  
570 RFP (consortium 1). The interaction ranges are consistent for the two consortia (Fig.  
571 3a shows consortium 1, S52a consortium 2), but the fluorescent label affect the growth

572 rate to some extent: the  $\Delta trpC$ -RFP grows generally slower than the  $\Delta trpC$ -GFP (Fig.  
3b-c shows consortium 1, Fig. S5b-c consortium 2).

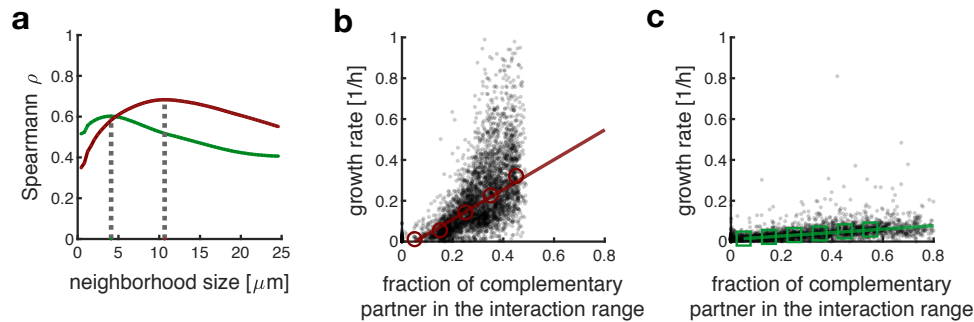

Figure S5. **Individuals interact at a small spatial range.** The plots show data for consortia number 2 ( $\Delta trpC$ -RFP and  $\Delta proC$ -GFP), and complement Fig. 3 showing data from consortia number 1 ( $\Delta trpC$  GFP and  $\Delta proC$ -RFP). (a) The cells' growth rate correlates maximally with the identity of their neighbours within the interaction range. (b-c) Both auxotrophic cells grow faster when surrounded by more complementary partners inside the interaction range. Tryptophan auxotrophs (b) achieve generally smaller growth rates than proline auxotrophs (c), as shown by the slopes of the linear regression (0.79 for  $\Delta proC$  and 0.089 for  $\Delta trpC$ ). Black dots: single cells (6,871 for  $\Delta proC$  and 3,832 for  $\Delta trpC$ ); red (green) open symbols: binned median values; lines: linear regression on binned values.

573

574

## 2. Individual-base model

575 **2.1. Rescaled equations.** The individual-based model describes two cell types on a  
576 squared grid: type A can only produce amino acid 1 while type B can only produce  
577 amino acid 2. The growth of type A is thus limited by the supply of amino acid 2 leaked  
578 by type B cells and vice versa. At every site, the internal and external concentration of  
579 amino acids are described by the following equations (definition of parameters in the

580 Methods).

$$\begin{aligned}
 (1) \quad & \frac{\partial I_1}{\partial t} = 0 && \text{if type is A} \\
 (2) \quad & \frac{\partial I_1}{\partial t} = r_1^u \cdot E_1 - r_1^l \cdot (I_1 - E_1) - \frac{\mu^{max} \cdot I_1}{K_1 + I_1} \cdot I_1 && \text{if type is B} \\
 (3) \quad & \frac{\partial I_2}{\partial t} = r_2^u \cdot E_2 - r_2^l \cdot (I_2 - E_2) - \frac{\mu^{max} \cdot I_2}{K_2 + I_2} \cdot I_2 && \text{if type is A} \\
 (4) \quad & \frac{\partial I_2}{\partial t} = 0 && \text{if type is B} \\
 (5) \quad & \frac{\partial E_i}{\partial t} = -\alpha \cdot r_i^u \cdot E_i + \alpha \cdot r_i^l \cdot (I_i - E_i) + D_i^{eff} \nabla^2 E_i
 \end{aligned}$$

581 We can reduce the number of parameters by rescaling units as follows:

- 582 • concentrations are measured in units of  $K_i$
- 583 • time is measured in units of inverse growth rate:  $\frac{1}{\mu^{max}}$
- 584 • space is measured in units of cell size:  $\Delta x$ .

585 This gives the following equations:

$$\begin{aligned}
 (6) \quad & \frac{\partial \hat{I}_1}{\partial \hat{t}} = 0 && \text{if type is A} \\
 (7) \quad & \frac{\partial \hat{I}_1}{\partial \hat{t}} = \hat{r}_1^u \cdot \hat{E}_1 - \hat{r}_1^l \cdot (\hat{I}_1 - \hat{E}_1) - \frac{\hat{I}_1}{1 + \hat{I}_1} \cdot \hat{I}_1 && \text{if type is B} \\
 (8) \quad & \frac{\partial \hat{I}_2}{\partial \hat{t}} = \hat{r}_2^u \cdot \hat{E}_2 - \hat{r}_2^l \cdot (\hat{I}_2 - \hat{E}_2) - \frac{\hat{I}_2}{1 + \hat{I}_2} \cdot \hat{I}_2 && \text{if type is A} \\
 (9) \quad & \frac{\partial \hat{I}_2}{\partial \hat{t}} = 0 && \text{if type is B} \\
 (10) \quad & \frac{\partial \hat{E}_i}{\partial \hat{t}} = -\alpha \cdot \hat{r}_i^u \cdot \hat{E}_i + \alpha \cdot \hat{r}_i^l \cdot (\hat{I}_i - \hat{E}_i) + \hat{D}_i^{eff} \hat{\nabla}^2 \hat{E}_i
 \end{aligned}$$

Where:

$$\begin{aligned}
 \hat{I}_i &= \frac{I_i}{K_i} & \hat{E}_i &= \frac{E_i}{K_i} & \hat{t} &= \mu^{max} \cdot t \\
 \hat{r}_i^u &= \frac{r_i^u}{\mu^{max}} & \hat{r}_i^l &= \frac{r_i^l}{\mu^{max}} & \hat{D}_i^{eff} &= \frac{D_i^{eff}}{\mu^{max} \cdot \Delta x^2} = \frac{(1-\rho) \cdot D_i}{(1+\frac{\rho}{2}) \cdot \mu^{max} \cdot \Delta x^2} & \alpha &= \frac{\rho}{(1-\rho)}
 \end{aligned}$$

586 In the remainder of this text we will omit the hats: all variables and parameters always  
 587 refer to the rescaled ones.

588

589 **2.2. Steady state equations.** We want to obtain the steady state concentration  $E_i(x, y)$   
 590 and  $I_i(x, y)$  on every site  $(x, y)$  of the grid. Setting equation 7 or 8 to steady state and  
 591 rewriting gives:

$$0 = r_i^u \cdot E_i - r_i^l \cdot (I_i - E_i) - \frac{I_i}{1 + I_i} \cdot I_i$$

$$0 = (1 + r_i^l)I_i^2 + (r_i^l - (r_i^u + r_i^l)E_i) I_i - (r_i^u + r_i^l)E_i$$

592 Which we can solve to get the internal concentration of the amino acid each cell cannot  
 593 produce as function of the external concentration of that amino acid:

$$(11) \quad I_i(E_i) = f(E_i) = \frac{(r_i^u + r_i^l)E_i - r_i^l}{2(1 + r_i^l)} + \frac{\sqrt{(r_i^l)^2 + (r_i^u + r_i^l)^2 E_i^2 + (2r_i^l + 4)(r_i^u + r_i^l)E_i}}{2(1 + r_i^l)}$$

594 The internal concentration of the produced amino acid is kept constant (equations 6  
 595 and 9):

$$(12) \quad I_i(E_i) = I_i^C.$$

596 Setting equation 10 to steady state gives:

$$(13) \quad \nabla^2 E_i = \frac{\alpha \cdot (r_i^u + r_i^l)}{D_i^{eff}} E_i - \frac{\alpha \cdot r_i^l}{D_i^{eff}} I_i(E_i)$$

597 where  $I_i(E_i)$  is given by equation 12 for grid sites where amino acid  $i$  is produced and  
 598 by equation 11 otherwise. If we describe the spatial arrangement of the two cell types  
 599 with the function  $T(x, y)$ :

$$(14) \quad \begin{aligned} T(x, y) &= 0 && \text{if site } (x, y) \text{ is occupied by type A} \\ T(x, y) &= 1 && \text{if site } (x, y) \text{ is occupied by type B} \end{aligned}$$

600 then the external concentration of the two amino acid on each grid site is the solution of  
601 the equations:

$$(15) \quad \nabla^2 E_1(x, y) = \frac{\alpha(r_1^u + r_1^l)}{D_1^{eff}} E_1(x, y) - \frac{\alpha r_1^l}{D_1^{eff}} \cdot (T(x, y) \cdot f(E_1(x, y)) + [1 - T(x, y)] \cdot I_1^C)$$

$$(16) \quad \nabla^2 E_2(x, y) = \frac{\alpha(r_2^u + r_2^l)}{D_2^{eff}} E_2(x, y) - \frac{\alpha r_2^l}{D_2^{eff}} \cdot ([1 - T(x, y)] \cdot f(E_2(x, y)) + T(x, y) \cdot I_2^C)$$

After solving for  $E_i(x, y)$  we can obtain the growth profile  $\mu(x, y)$ :

$$(17) \quad \mu(x, y) = [1 - T(x, y)] \cdot \frac{I_2(x, y)}{1 + I_2(x, y)} + T(x, y) \cdot \frac{I_1(x, y)}{1 + I_1(x, y)}$$

$$(18) \quad I_i(x, y) = f(E_i(x, y))$$

602 **2.3. Numerical solution and boundary condition.** We numerically solved equations  
603 15 and 16 on the grid. On one edge of the grid we implement a Dirichlet boundary  
604 condition and set  $E_i = 0$  to represent the flow-channel where all excreted amino-  
605 acids are washed away; on all other edges we implement Neumann no-flux boundary  
606 conditions to represents the solid wall of the growth chamber. We solved equations 15  
607 and 16 by discretizing them using a second order finite difference scheme and solving  
608 them using a successive over-relaxation solver. To ensure numerical stability, we imple-  
609 mented a grid-refinement procedure: we first solved the equations on the 40x40 grid and  
610 then we iterated on refined grids (successively doubling the number of grid points in  
611 each dimension); we used the solution of the previous iteration as the initial state for the  
612 successive refined grid. The solution on the refined grid was downsampled to the 40x40  
613 grid to calculate the growth rate for each cell and we continued this procedure until the  
614 maximum per cell change in growth rate was less than 1%. All code was implemented  
615 in Matlab.

616 **2.4. Analytical limits.** We derived several analytical approximations to understand the  
617 effect of each parameter, which we summarize in subsection 2.5. Here we will consider  
618 a single cell type at a time and follow the internal,  $I_L$ , and external,  $E_L$ , concentration

619 of the limiting amino-acid only:

$$(19) \quad \frac{\partial I_L}{\partial t} = r^u \cdot E_L - r^l \cdot (I_L - E_L) - \frac{I_L}{1 + I_L} \cdot I_L$$

$$(20) \quad \frac{\partial E_L}{\partial t} = -\alpha \cdot r^u \cdot E_L + \alpha \cdot r^l \cdot (I_L - E_L) + D^{eff} \nabla^2 E_L.$$

620 Where  $r^u$ ,  $r^l$ , and  $D^{eff}$  always refer to the uptake, leakage, and effective diffusion  
 621 constant of the growth limiting amino acid. It is useful to rewrite these equation in  
 622 terms of  $\epsilon = \frac{r^u + r^l}{r^l} E_L$ :

$$(21) \quad \frac{\partial I_L}{\partial t} = r^l \cdot \epsilon - r^l \cdot I_L - \frac{I_L}{1 + I_L} \cdot I_L$$

$$(22) \quad \frac{\partial \epsilon}{\partial t} = \alpha \cdot (r^u + r^l) \cdot (I_L - \epsilon) + D^{eff} \nabla^2 \epsilon$$

623 2.4.1. *Limiting amino acid at steady state.* Setting the time derivatives to zero and  
 624 solving 21 for  $I_L$  gives:

$$(23) \quad I_L(\epsilon) = \frac{(\epsilon - 1)r^l + \sqrt{(\epsilon - 1)^2(r^l)^2 + 4(1 + r^l)r^l\epsilon}}{2(1 + r^l)}$$

625 2.4.2. *Maximum cell growth rate.* We derive the analytical expression for the growth  
 626 rate of an auxotrophic cells surrounded by a large number of producing partners. If we  
 627 assume that the single auxotroph has a negligible influence on the external concentration  
 628 (i.e. all space is occupied by producers which have  $I = I^C$ ), equation 22 gives the steady  
 629 state external concentration of amino acids:

$$(24) \quad \epsilon_{max} = I^C$$

630 substituting  $\epsilon_{max}$  for  $\epsilon$  in eq. 23 we find:

$$(25) \quad I_L^{max} = \frac{(I^C - 1)r^l + \sqrt{(I^C - 1)^2(r^l)^2 + 4(1 + r^l)r^l I^C}}{2(1 + r^l)}$$

$$\mu^{max} = \frac{I_L^{max}}{1 + I_L^{max}}$$

631 This is the growth rate of a single auxotrophs surrounded by a large number of amino  
 632 acid producing partners. We can simplify this expression if we make the following two  
 633 assumptions:

634 **Assumption 2.4.1.**  $I^C \gg 1$ . *Biologically this means that a wild type (amino acid*  
635 *producing) cell can grow nearly as fast in the absence of amino acids ( $\mu = \frac{I^C}{1+I^C}$ ) as in*  
636 *the presence of amino acids ( $\mu = 1$ ). We verified experimentally that this assumption*  
637 *holds.*

638 **Assumption 2.4.2.**  $r^l \ll 1$ . *Biologically this means that in wild type cells the decrease in*  
639 *the concentration of limiting amino acid due to leakage (with rate  $r^l$ ) is small compared*  
640 *to the decrease due to growth (with rate 1).*

641 With these assumptions the growth rate of an auxotroph surrounded by the producing  
642 partner (eq. 25) simplifies to:

$$(26) \quad I_L^{max} \approx \frac{1}{2} I^C r^l \left( 1 + \sqrt{1 + \frac{4}{I^C r^l}} \right)$$
$$\mu^{max} = \frac{I_L^{max}}{1 + I_L^{max}}$$

643 2.4.3. *Estimating leakage rates.* In this subsection we show how we estimated the leakage  
644 rates from the maximum empirical growth rates of the auxotrophs. In the limit of  $r^l \ll 1$   
645 and  $I^C \gg 1$ , the maximum growth rate (equations 26) depends on the product  $I^C \cdot r^l$ ,  
646 and not on the two parameters separately. Both parameters are unknown but we expect  
647  $I^C \gg 1$  (assumption 2.4.1), which we arbitrarily set to 20 ( $\mu_{producer} = 0.95$ ). With this,  
648 we can estimate the leakage rates  $r^l$  for each amino acid from  $\mu^{max}$  of the corresponding  
649 auxotroph. Note that our result are robust to changes in value assigned to  $I^C$  as long as it  
650 is larger then one (we confirmed that our simulations depend only on the product  $I^C \cdot r^l$   
651 as long as  $r^l \ll 1$  and  $I^C \gg 1$ ). The maximum empirical growth rate  $\mu^{max}$  is estimated  
652 for each auxotroph by performing a linear regression between the auxotroph's growth  
653 rate and the fraction of the producing partner within the interaction range (Fig. 3c-d);  
654 the maximum growth rate is the value extrapolated when the fraction is equal to one.  
655 We use linear regression because it is less sensitive to measurement noise than using the  
656 maximal observed growth rate, and because very few cells are found surrounded by the  
657 producing partner because of kin clustering.

658 2.4.4. *Analytical expression for the growth range.* In this subsection we show how we  
659 calculated the growth range, a quantity proportional to the interaction range measured  
660 experimentally (Fig.4e), from the parameters of the model. Let us consider a symmetric

661 spatial arrangement of types (Fig.4b), with all cells located at  $x < 0$  producing the amino  
 662 acid that cells at  $x > 0$  require for their growth, and vice versa. This arrangement reduces  
 663 the problem to one dimension and we can analytically calculate the cells' growth rates  
 664 (we will do that for  $x > 0$ ).

665 We can find the external amino acid concentration by solving equation 22 at steady  
 666 state, where the internal concentration is  $I = I^C$  for  $x < 0$  and  $I = I_L(\epsilon)$  for  $x > 0$ :

$$(27) \quad \frac{d^2 \epsilon}{dx^2} = \begin{cases} \frac{1}{r_0^2} (\epsilon - I^C) & \text{if } x < 0 \\ \frac{1}{r_0^2} (\epsilon - I_L(\epsilon)) & \text{if } x > 0 \end{cases}$$

where  $I_L(\epsilon)$  is given by equation 23 and

$$r_0 = \sqrt{\frac{D^{eff}}{\alpha(r^u + r^l)}}$$

667 For  $x > 0$  the analytical solution cannot be found due to the non-linear term

$$(28) \quad I_L(\epsilon) = \frac{r^l}{2}(\epsilon - 1) + \frac{1}{2}\sqrt{(\epsilon - 1)^2(r^l)^2 + 4r^l\epsilon}$$

668 where we have simplified equation 23 using assumption 2.4.2 ( $r^l \ll 1$ ). However it is  
 669 easy to show that

$$I_L(\epsilon) < 1 + \epsilon r^l$$

670 and thus the non linear term  $I_L(\epsilon)$  is negligible when  $\epsilon \gg \frac{1}{1+r^l} \approx 1$ . For  $x \ll 0$  the  
 671 external concentration is the steady state concentration as found in a region of producers  
 672 only, i.e.  $\epsilon(x \ll 0) = I^C \gg 1$  (see subsection 2.4.2). Close to the interface, we expect  
 673  $\epsilon(x \approx 0)$  to be of the order of  $I^C$  for continuity. Thus, close to the interface we can solve  
 674 a simplified linear ODE:

$$\frac{d^2 \epsilon}{dx^2} \approx \frac{1}{r_0^2} \cdot \epsilon.$$

675 The full solution is thus given by:

$$\epsilon(x) = \begin{cases} C_1 \cdot e^{x/r_0} + I^C & \text{if } x < 0 \\ C_2 \cdot e^{-x/r_0} & \text{if } x > 0. \end{cases}$$

676 We can solve for  $C_1$  and  $C_2$  imposing continuity of concentration and flux at the interface:

$$\begin{aligned} C_1 \cdot e^{x/r_0} + I^C \Big|_{x=0} &= C_2 \cdot e^{-x/r_0} \Big|_{x=0} \\ \frac{C_1}{r_0} \cdot e^{x/r_0} \Big|_{x=0} &= -\frac{C_2}{r_0} \cdot e^{-x/r_0} \Big|_{x=0}. \end{aligned}$$



677 From which we find that  $C_1 = -\frac{I^C}{2}$  and  $C_2 = \frac{I^C}{2}$ . Thus the external concentration is  
 678 given by:

$$(29) \quad \epsilon(x) = \begin{cases} I^C \left(1 - \frac{1}{2} \cdot e^{x/r_0}\right) & \text{if } x < 0 \\ \frac{I^C}{2} \cdot e^{-x/r_0} & \text{if } x > 0 \end{cases}$$

679 Thus within the consumer region the amino acid concentration ( $E = \frac{r^l}{r^u+r^l}\epsilon$ ) decreases  
 680 exponentially with scale factor  $r_0$ .

681 We are now interested in finding an analytical approximation for the *growth range*  
 682 ( $GR$ ), which is the distance from the interface where cells have 50% of the growth rate  
 683 they have at the interface:

$$(30) \quad \mu(x = GR) = \frac{1}{2} \cdot \mu(x = 0)$$

684 as  $\mu = \frac{I}{1+I}$  it follows that

$$(31) \quad I_L(x = GR) = \frac{I_L(x = 0)}{2 + I_L(x = 0)}$$

685 Where  $I_L(x) \equiv I_L(\epsilon(x))$  is given by eq. 28. Substituting  $\epsilon(x) = \frac{I^C}{2}e^{-GR/r_0}$  gives:

$$(32) \quad \frac{r^l}{4}(I^C e^{-GR/r_0} - 2) + \frac{1}{2}\sqrt{\left(\frac{I^C}{2}e^{-GR/r_0} - 1\right)^2(r^l)^2 + 2r^l I^C e^{-GR/r_0}}$$

$$= \frac{\frac{r^l}{2}(I^C - 2) + \sqrt{\left(\frac{I^C}{2} - 1\right)^2(r^l)^2 + 2r^l I^C}}{4 + \frac{r^l}{2}(I^C - 2) + \sqrt{\left(\frac{I^C}{2} - 1\right)^2(r^l)^2 + 2r^l I^C}}$$

686 Which we can solve for  $GR$  to find:

$$(33) \quad GR = r_0 \cdot \ln \left[ \frac{(I^C - 4) \left( r^l(I^C + 2) + \sqrt{(I^C - 2)^2(r^l)^2 + 8I^C r^l} \right) + 8I^C}{2(I^C(1 + r^l) - 4r^l)} \right]$$

and we can further simplify using assumption 2.4.1 ( $I^C \gg 1$ ) to find:

$$(34) \quad GR = r_0 \cdot \ln \left[ \frac{1}{2}r^l I^C \left( 1 + \sqrt{1 + \frac{8}{r^l I^C}} \right) + 4 \right]$$

687 Figure S6b shows the error of our analytical approximation of the growth range. As  
 688 long as the growth range is smaller than 20, our simulations match the analytical result  
 689 very well. As the growth range approaches 20 (Fig. S6a, this is same heat map as Fig  
 690 4f), the relative error increases because of the finite size (40x40) of the chamber in our

691 simulations; more specifically, the no-flux boundary conditions lead to overestimation  
of the growth range in the simulations compared to the analytical model.

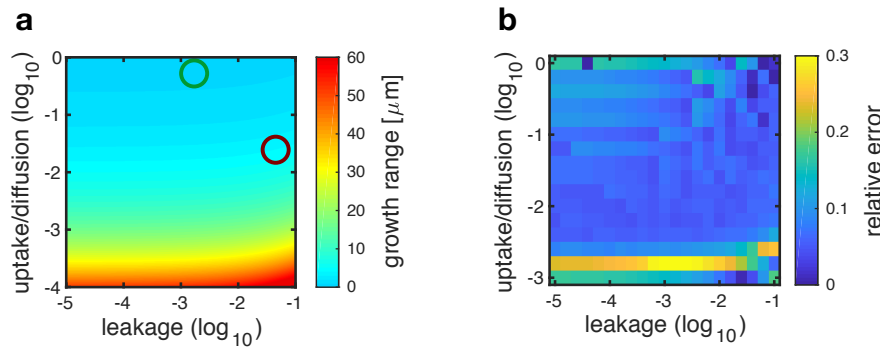

Figure S6. **Analytical approximation of growth range and simulations agree.** The heat map (b) shows the relative error between analytical approximation (eq. 34) for the growth range and the growth range estimated with simulations. The heat map (a) shows the analytical estimate of the growth range, and shows that the relative error in (b) is low when the growth range is below 20. Red circle is proline auxotroph and green circle is tryptophan auxotroph. Leakage is expressed in normalised units (units of  $\mu^{max}$ ).

692

693 **2.5. Discussion on the effect of parameters.** We have found two analytical approximations  
694 for the maximum growth rate of each auxotroph when surrounded by a large number of  
695 the amino acid producing partner and for the growth range:

$$(35) \quad \mu^{max} \approx \frac{r^l I^C \left( 1 + \sqrt{1 + \frac{4}{r^l I^C}} \right)}{2 + r^l I^C \left( 1 + \sqrt{1 + \frac{4}{r^l I^C}} \right)}$$

$$(36) \quad GR \approx \sqrt{\frac{D^{eff}}{\alpha(r^u + r^l)}} \cdot \ln \left[ \frac{1}{2} r^l I^C \left( 1 + \sqrt{1 + \frac{8}{r^l I^C}} \right) + 4 \right]$$

696 We can make some observations:

- 697 • The maximum growth rate does not depend on the uptake rate of amino acids  
698 but only on the leakage rate.
- 699 • The growth range depends strongly (square-root) on the uptake rate and the  
700 diffusion constant and weakly (logarithmic) on the leakage rate.
- 701 • The cell density strongly affects the growth range by modulating the effective  
702 diffusion constant and ratio between *intra* to *extra* cellular environment.

703 To remind the reader:  $\frac{D^{eff}}{\alpha}$  depends on the cell density  $\rho$ , which affects both the diffusion  
704 constant  $D^{eff} = \frac{1-\rho}{1+\rho/2} \cdot D$  and the volume ratio of *intra* to *extra* cellular environment  
 $\alpha = \frac{\rho}{1-\rho}$ . So

$$(37) \quad \frac{D^{eff}}{\alpha} = \frac{2(1-\rho)^2}{\rho(2+\rho)} \cdot D$$

Figure S7 shows how  $D^{eff}$  and  $\frac{D^{eff}}{\alpha}$  depend on density  $\rho$ .

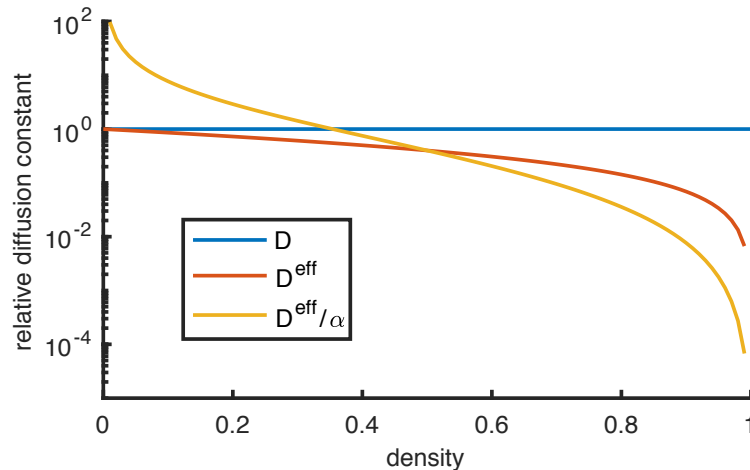

Figure S7. **Effect of density of cells on diffusion of molecules.** Dependence of  $D^{eff}$  and  $\frac{D^{eff}}{\alpha}$  on density  $\rho$ . High cellular densities reduce the effective diffusion of molecules. In our microfluidic chambers cellular density is about 0.65.

705

706

### 3. Supplementary methods

707 **3.1. Proportionality of analytical growth range and interaction range.** Given a set  
708 of parameters, we calculated analytically the growth range using Equation 34 and we  
709 estimated the interaction range with the model. The interaction range was estimated  
710 as follows: we ran our model on experimentally observed spatial arrangements after  
711 downscaling the segmented images to a 40x40 grid. We used the model predicted growth  
712 rates and repeated the correlation analysis described in Methods to extract the predicted  
713 interaction range. Figure 4e (proportionality between growth range and interaction range)  
714 is made by changing the uptake of the amino acids and keeping all other parameters fixed  
715 (see Table S1).

716

#### 4. Supplementary Tables

717

We list here all parameters of the individual-based model with their source.

| Parameter   | Description                       | Value                         | Source                                     |
|-------------|-----------------------------------|-------------------------------|--------------------------------------------|
| $r_1^u$     | uptake of proline                 | 1.37 1/sec                    | Literature (2)                             |
| $r_2^u$     | uptake of tryptophan              | 21.9 1/sec                    | Literature (3)                             |
| $D_1$       | diffusion of proline              | $8.79 \cdot 10^2 \mu m^2/sec$ | Literature (4)                             |
| $D_2$       | diffusion of tryptophan           | $6.59 \cdot 10^2 \mu m^2/sec$ | Literature (5)                             |
| $\mu^{max}$ | growth on M9 media + 0.2% glucose | 1.29 1/h                      | Measured                                   |
| $r_1^l$     | leakage proline                   | $1.61 \cdot 10^{-5} 1/sec$    | Fitted (see Sup. Eq.)                      |
| $r_2^l$     | leakage tryptophan                | $6.08 \cdot 10^{-7} 1/sec$    | Fitted (see Sup. Eq.)                      |
| $\rho$      | density of cells                  | 0.65                          | Measured                                   |
| dX          | grid (cell) size                  | 1.5 $\mu m$                   | Estimated from number of cells per chamber |

Table S1. **Parameters of individual-based model.** All parameters of the model are taken from literature or measured, apart from the two leakage rates, which are estimated as described in section 2.4.3

718

#### 5. Captions for Movies

719 **Supplementary Movie S1:** Two auxotrophic strains of *Escherichia coli* growing  
720 in microfluidic chambers of  $60 \times 60 \mu m$ . Proline auxotrophic cells are shown in red,  
721 tryptophan auxotrophic cells in green. The auxotrophic cells grow faster when they are  
722 close to the complementary partner.

723 **Supplementary Movie S2:** The growth rate of auxotrophic cells depends on the  
724 identity of neighbours. Cells are coloured based on their growth rate (lighter colours  
725 indicate higher growth rates). Growth rates are higher for auxotrophic cells close to  
726 the complementary partner. Proline auxotrophic cells are shown in purple, tryptophan  
727 auxotrophic cells in yellow.

728

#### 6. References

729 1. Kovarova-Kovar, K. Egli, T. (1998) Growth Kinetics of Suspended Microbial Cells:  
730 From Single- Substrate-Controlled Growth to Mixed-Substrate Kinetics. *Microbiol.*

731 *Mol. Biol. Rev.* 2:646-666 .

732 2. Grothe, S., Krogsrud, R. L., McClellan, D. J., Milner, J. L. Wood, J. M. (1986)

733 Proline Transport and Osmotic Stress Response in *Escherichia coli* K-12. *Journal of*  
734 *Bacteriology.* 166:253-259

735 3. Piperno, J. R., Oxender, D. L. (1968) Amino Acid Transport Systems in *Escherichia*  
736 *coli.* *Journal. Biol. Chem.* 243:5914-5920 .

737 4. Wu, Y., Ma, P., Liu, Y. Li, S. (2001) Diffusion coefficients of l-proline , l-threonine  
738 and l-arginine in aqueous solutions at 25°C. *Fluid Phase Equilibria.* 186:27-38.

739 5. Longsworth, L. G. Diffusion (1953) Measurements, at 25°C, of Aqueous Solutions  
740 of Amino Acids, Peptides and Sugars. *Contrib. from Lab. Rockefeller Inst. Med. Res.*  
741 Nov. 20.

742
